# Supplementary material for: Thermoelectrics in ice slabs: charge dynamics and thermovoltages
Source: Royal Society of Chemistry journal article supplement (doi:10.1039/d1cp02304g), 2021-01-01
Supplement: d1cp02304g1.pdf [file d1cp02304g1.pdf]

## Supplementary Information

# Thermoelectrics in Ice Slabs: Charge Dynamics and Thermovoltages

Hongwei Zhang<sup>a</sup>, John De Poorter<sup>b\*</sup>, Ranit Mukherjee<sup>a</sup>, Jonathan B. Boreyko<sup>a</sup>, and Rui Qiao<sup>a†</sup>

<sup>a</sup> Department of Mechanical Engineering, Virginia Tech, Blacksburg, VA 24061, USA

<sup>b</sup> Horatio vzw, Koningin Maria Hendrikaplein 64d, Ghent 9000, Belgium

May 22, 2021

## 1 Mathematical justification of two key features in the slow stage

### 1.1 $\mathcal{O}(d(\Gamma_+ - \Gamma_-)/dt) \sim \mathcal{O}(d(\Gamma_D - \Gamma_L)/dt)$

As discussed in the main text, the net charges at the left half of the ice slab are obtained as

$$e_{\pm}(\Gamma_+ - \Gamma_-) = P_{b,m} \frac{e_{\pm}}{e} + E_m \epsilon_0 \epsilon_{\infty} \frac{e_{\pm}}{e} \quad (\text{S1})$$

$$e_{DL}(\Gamma_D - \Gamma_L) = -P_{b,m} \frac{e_{\pm}}{e} + E_m \epsilon_0 \epsilon_{\infty} \frac{e_{DL}}{e} \quad (\text{S2})$$

By taking the time derivative of Eq. S1 and S2, we have

$$e_{\pm} \frac{d(\Gamma_+ - \Gamma_-)}{dt} = \frac{dP_{b,m}}{dt} \frac{e_{\pm}}{e} + \frac{dE_m}{dt} \epsilon_0 \epsilon_{\infty} \frac{e_{\pm}}{e} \quad (\text{S3})$$

$$e_{DL} \frac{d(\Gamma_D - \Gamma_L)}{dt} = -\frac{dP_{b,m}}{dt} \frac{e_{\pm}}{e} + \frac{dE_m}{dt} \epsilon_0 \epsilon_{\infty} \frac{e_{DL}}{e} \quad (\text{S4})$$

In the slow stage, the ionic defect transport weakens the electric field while enhances the polarization field. Because the electric field are positive and polarization field are negative after the pseudo-steady state, the changes of electric and polarization field are all negative corresponding to

\*To whom correspondence should be addressed, email: john.zarat@gmail.com.

†To whom correspondence should be addressed, email: ruiqiao@vt.edu.

$dP_{b,m}/dt < 0$  and  $dE_m/dt < 0$  in Eq. S3 and S4 as shown in Fig. 3d of the main text. Therefore, we have  $|e_{DL}d(\Gamma_D - \Gamma_L)/dt| < |e_{\pm}d(\Gamma_+ - \Gamma_-)dt|$ , meaning  $|d(\Gamma_D - \Gamma_L)/dt|$  is smaller than  $|d(\Gamma_+ - \Gamma_-)/dt|$  or at least at the same order of magnitude.

## 1.2 $\mathcal{O}(dF_m/dt) \ll \mathcal{O}(dE_m/dt)$

The time derivatives of  $P_{b,m}$  and  $E_m$  decrease gradually when they approach to the steady state as shown in Fig. 3d in the main text. Therefore, both  $P_{b,m}(t)$  and  $E_m(t)$  are concave functions to time such that their second derivatives to time are all positive. Now, if we take the time derivative of Eq. S3 and S4, we obtain

$$\begin{aligned} e_{\pm} \frac{d^2(\Gamma_+ - \Gamma_-)}{dt^2} &= \frac{d^2 P_{b,m}}{dt^2} \frac{e_{\pm}}{e} + \frac{d^2 E_m}{dt^2} \epsilon_0 \epsilon_{\infty} \frac{e_{\pm}}{e} \\ e_{DL} \frac{d^2(\Gamma_D - \Gamma_L)}{dt^2} &= -\frac{d^2 P_{b,m}}{dt^2} \frac{e_{\pm}}{e} + \frac{d^2 E_m}{dt^2} \epsilon_0 \epsilon_{\infty} \frac{e_{DL}}{e} \end{aligned} \quad (\text{S5})$$

where  $\frac{d^2 P_{b,m}}{dt^2}$  and  $\frac{d^2 E_m}{dt^2} \epsilon_0 \epsilon_{\infty}$  are all positive. Similar to Section 1.1, we have  $|e_{DL}d^2(\Gamma_D - \Gamma_L)/dt^2| < |e_{\pm}d^2(\Gamma_+ - \Gamma_-)/dt^2|$ .

Next, integrating the governing equation of the density evolution of a charge carrier  $i$  over the ice slab's left half, we have

$$\begin{aligned} \int_0^{W/2} \frac{\partial n_i}{\partial t} dx &= \int_0^{W/2} \left( -\frac{\partial j_i}{\partial x} + G_i + R_i \right) dx \\ \frac{d\Gamma_i}{dt} &= -(j_i|_{W/2} - j_i|_0) + \int_0^{W/2} (G_i + R_i) dx \end{aligned} \quad (\text{S6})$$

with  $j_i|_0 = 0$  (Eq. 11). The net excesses of  $\text{H}^+$  defect over  $\text{OH}^-$  defect and D defects over L defects in ice slab's left half then follow

$$\frac{d(\Gamma_+ - \Gamma_-)}{dt} = (D_+ - D_-) \frac{dn_{\pm}^0}{dx} \Big|_{W/2} - (D_+ + D_-) \frac{e_{\pm}}{k_B T} n_{\pm,m}^0 \left( E_m + \frac{\Phi}{e_{\pm} e_{DL}} P_{b,m} \right) \quad (\text{S7})$$

$$\frac{d(\Gamma_D - \Gamma_L)}{dt} = (D_D - D_L) \frac{dn_{DL}^0}{dx} \Big|_{W/2} - (D_D + D_L) \frac{e_{DL}}{k_B T} n_{DL,m}^0 \left( E_m - \frac{\Phi}{e_{DL}^2} P_{b,m} \right) \quad (\text{S8})$$

Now, we multiply Eq. S7 with  $e_{\pm}$  and Eq. S8 with  $e_{DL}$  and take the time derivatives of them

$$e_{\pm} \frac{d^2(\Gamma_+ - \Gamma_-)}{dt^2} = \frac{d}{dt} \left[ e_{\pm} (D_+ - D_-) \frac{dn_{\pm}^0}{dx} \Big|_{W/2} \right] - \frac{d}{dt} \left[ (D_+ + D_-) \frac{e_{\pm}^2}{k_B T} n_{\pm,m}^0 \left( E_m + \frac{\Phi}{e_{\pm} e_{DL}} P_{b,m} \right) \right] \quad (\text{S9})$$

$$e_{DL} \frac{d^2(\Gamma_D - \Gamma_L)}{dt^2} = \frac{d}{dt} \left[ e_{DL} (D_D - D_L) \frac{dn_{DL}^0}{dx} \Big|_{W/2} \right] - \frac{d}{dt} \left[ (D_D + D_L) \frac{e_{DL}^2}{k_B T} n_{DL,m}^0 \left( E_m - \frac{\Phi}{e_{DL}^2} P_{b,m} \right) \right] \quad (\text{S10})$$

Taking advantage of the fact that the region near ice slab's middle plane is bulk-like, the diffusion terms are time independent and can be eliminated so that Eq. S9 and S10 can be simplified to

$$e_{\pm} \frac{d^2(\Gamma_+ - \Gamma_-)}{dt^2} = -\frac{d}{dt} \left[ e_{\pm}(D_+ + D_-) \frac{e_{\pm}}{k_B T} n_{\pm,m}^0 \left( E_m + \frac{\Phi}{e_{\pm} e_{DL}} P_{b,m} \right) \right] \quad (\text{S11})$$

$$e_{DL} \frac{d^2(\Gamma_D - \Gamma_L)}{dt^2} = -\frac{d}{dt} \left[ e_{DL}(D_D + D_L) \frac{e_{DL}}{k_B T} n_{DL,m}^0 \left( E_m - \frac{\Phi}{e_{DL}^2} P_{b,m} \right) \right] \quad (\text{S12})$$

With  $|e_{DL} d^2(\Gamma_D - \Gamma_L)/dt^2| < |e_{\pm} d^2(\Gamma_+ - \Gamma_-)/dt^2|$ , we have the following relationship by introducing  $F_m = E_m - P_{b,m} \Phi / e_{DL}^2$  in Eq. S12.

$$\frac{d}{dt} \left| -e_{DL}(D_D + D_L) \frac{e_{DL}}{k_B T} n_{DL,m}^0 F_m \right| < \frac{d}{dt} \left| -e_{\pm}(D_+ + D_-) \frac{e_{\pm}}{k_B T} n_{\pm,m}^0 \left( E_m + \frac{\Phi}{e_{\pm} e_{DL}} P_{b,m} \right) \right| \quad (\text{S13})$$

Because the ionic defect density is  $\sim 10^6$  times smaller than that of Bjerrum defects (i.e.  $n_{\pm,m}^0 \ll n_{DL,m}^0$ ), we have

$$\frac{d}{dt} |F_m| \ll \frac{d}{dt} \left| \left( E_m + \frac{\Phi}{e_{\pm} e_{DL}} P_{b,m} \right) \right| \quad (\text{S14})$$

Here, we replace  $P_{b,m}$  with  $F_m$  to obtain the relationship of  $E_m$  and  $F_m$

$$\frac{d}{dt} |F_m| \ll \frac{d}{dt} \left| \left( E_m + \frac{e_{DL}}{e_{\pm}} (E_m - F_m) \right) \right| \quad (\text{S15})$$

Based on the absolute value inequality, we have

$$\frac{d}{dt} |F_m| \ll \frac{d}{dt} \left| \left( 1 + \frac{e_{DL}}{e_{\pm}} \right) E_m \right| - \frac{d}{dt} \left| \frac{e_{DL}}{e_{\pm}} F_m \right| \quad (\text{S16})$$

Move the second term at the right hand side to the left hand side, we obtain

$$\left| \frac{dF_m}{dt} \right| \ll \left| \frac{dE_m}{dt} \right| \quad (\text{S17})$$

## 2 Derivation of $P_m$ in the slow stage

The derivation of  $P_m$  follows the similar approach to that of  $E_m$  in the main text. Here, we substitute  $E_m$  in Eq. S7 with  $P_m$  and  $F_m$ .

$$\frac{d(\Gamma_+ - \Gamma_-)}{dt} = -\frac{e}{k_B T_m} \frac{\Phi}{e_{DL}^2} n_{\pm,m}^0 (D_+ + D_-) P_{b,m} - \frac{e_{\pm}}{k_B T_m} n_{\pm,m}^0 (D_+ + D_-) F_m + (D_+ - D_-) \frac{dn_{\pm}^0}{dx} \Big|_{W/2} \quad (\text{S18})$$

Substituting  $F_m$  with Eq. S8, we obtain

$$\frac{\frac{d(\Gamma_+ - \Gamma_-)}{dt}}{(D_+ + D_-) \frac{n_{\pm,m}^0}{k_B T_m}} + \frac{\frac{e}{e_{DL}} \frac{d(\Gamma_D - \Gamma_L)}{dt}}{(D_D + D_L) \frac{n_{DL,m}^0}{k_B T_m}} = -\frac{\Phi e}{e_{DL}^2} P_{b,m}(t) - \left[ \frac{1 - \beta_{\pm}}{1 + \beta_{\pm}} \frac{\Phi_{\pm}}{2T_m} - \frac{1 - \beta_{DL}}{1 + \beta_{DL}} \frac{\Phi_{DL} e_{\pm}}{2T_m e_{DL}} \right] \frac{dT}{dx} \quad (\text{S19})$$

Because  $n_{DL,m}^0 \sim 10^6 n_{\pm,m}^0$  and  $\mathcal{O}(d(\Gamma_+ - \Gamma_-)/dt) \sim \mathcal{O}(d(\Gamma_D - \Gamma_L)/dt)$ , the second term on the left-hand side of Eq. S19 can be neglected. Substituting Eq. S1 into Eq. S19 we have,

$$\frac{\frac{d}{dt} \left[ P_{b,m} + \epsilon_0 \epsilon_{\infty} \left( \frac{\Phi}{e_{DL}^2} P_{b,m} + F_m \right) \right]}{e^2 (D_+ + D_-) n_{\pm,m}^0} = -\frac{\Phi e}{e_{DL}^2} P_{b,m}(t) + \left[ \frac{1 - \beta_{\pm}}{1 + \beta_{\pm}} \frac{\Phi_{\pm}}{2T_m} - \frac{1 - \beta_{DL}}{1 + \beta_{DL}} \frac{\Phi_{DL} e_{\pm}}{2T_m e_{DL}} \right] \frac{dT}{dx} \quad (\text{S20})$$

Because  $\mathcal{O}(dF_m/dt) \ll \mathcal{O}(dE_m/dt)$  and  $F_m = E_m - P_{b,m} \Phi / e_{DL}^2$ , we have

$\mathcal{O}(dF_m/dt) \ll \mathcal{O}(\Phi / e_{DL}^2 dP_{b,m}/dt)$ . Therefore, the  $F_m$  term in Eq. S20 can be neglected.

$$\frac{\left( \epsilon_0 \epsilon_{\infty} + \frac{e_{DL}^2}{\Phi} \right) k_B T_m \frac{dP_{b,m}(t)}{dt}}{e^2 (D_+ + D_-) n_{\pm,m}^0} = -P_{b,m}(t) + \frac{e_{DL}^2}{\Phi} \left[ \frac{1 - \beta_{\pm}}{1 + \beta_{\pm}} \frac{\Phi_{\pm}}{2T_m} - \frac{1 - \beta_{DL}}{1 + \beta_{DL}} \frac{\Phi_{DL} e_{\pm}}{2T_m e_{DL}} \right] \frac{dT}{dx} \quad (\text{S21})$$

Due to the much larger time scale in slow stage compare to that in fast stage, the initial condition for Eq. S21 can be approximated as  $P_b(t=0) = P_{b,m,f} = -\epsilon_0 \epsilon_{\infty} E_{m,f}$  so that we have

$$P_{b,m}(t) = (-\epsilon_0 \epsilon_{\infty} E_{m,f} - P_{b,m}(t = \infty)) e^{-t/\tau_{P_b,s}} + P_{b,m}(t = \infty) \quad (\text{S22})$$

The steady state polarization density field at ice slab's middle plane is

$$P_{b,m}(t = \infty) = -\frac{e_{DL}}{2e\Phi T_m} \left[ \frac{1 - \beta_{\pm}}{1 - \beta_{\pm}} \Phi_{\pm} e_{DL} - \frac{1 - \beta_{DL}}{1 - \beta_{DL}} \Phi_{DL} e_{\pm} \right] \frac{\Delta T}{W} \quad (\text{S23})$$

Here, we notice the time scale for  $P_{b,m}(t)$  to reach the steady state is same to that of  $E_m(t)$

$$\tau_{P_b,s} = \tau_{E,s} = \frac{k_B T_m \left( \epsilon_0 \epsilon_{\infty} + \frac{e_{DL}^2}{\Phi} \right)}{e^2 (D_+ + D_-) n_{\pm}^0} = \left( 1 + \frac{e_{DL}^2}{\Phi \epsilon_0 \epsilon_{\infty}} \right) \frac{e_{\pm}^2}{e^2} \frac{\lambda_{\pm}^2}{(D_+ + D_-)/2} \quad (\text{S24})$$

### 3 Literature values for defect properties in ice

The properties of point defects in ice reported in literature are presented in Table S1. The corresponding temperature at which a property was reported is shown, except for that of activation and migration energy, which is generally assumed to be insensitive to temperature.

**Table S1:** Properties of defects in ice from different sources.

|               | Value                                                            | Note  | Ref. |              | Value                        | Note  | Ref. |
|---------------|------------------------------------------------------------------|-------|------|--------------|------------------------------|-------|------|
| $\mu_+$       | $7.5 \times 10^{-6} \text{ m}^2/(\text{V}\cdot\text{s})$         | 273 K | 1    | $\mu_D$      | negligible                   | 253 K | 2    |
| $\mu_+$       | $2.7 \times 10^{-8} \text{ m}^2/(\text{V}\cdot\text{s})$         | 273 K | 3    | $\Phi_{\pm}$ | $1.2 \pm 0.1 \text{ eV}$     | –     | 4    |
| $\mu_+$       | $9.2 \times 10^{-8} \text{ m}^2/(\text{V}\cdot\text{s})$         | 240 K | 5    | $\Phi_{\pm}$ | $0.96 \pm 0.13 \text{ eV}$   | –     | 1    |
| $\mu_+$       | $1 \times 10^{-7} \text{ m}^2/(\text{V}\cdot\text{s})$           | 253 K | 2    | $\Phi_{\pm}$ | 1 eV                         | –     | 6    |
| $\mu_-$       | $7.5 \times 10^{-8 \sim -7} \text{ m}^2/(\text{V}\cdot\text{s})$ | 263 K | 1    | $\Phi_{\pm}$ | $\geq 1.4 \text{ eV}$        | –     | 2    |
| $\mu_-$       | $2.7 \times 10^{-8} \text{ m}^2/(\text{V}\cdot\text{s})$         | 240 K | 5    | $\Phi_{DL}$  | $0.68 \pm 0.04 \text{ eV}$   | –     | 4    |
| $\mu_-$       | $3 \times 10^{-8} \text{ m}^2/(\text{V}\cdot\text{s})$           | 253 K | 2    | $\Phi_{DL}$  | 0.664 eV                     | –     | 3    |
| $\mu_+/\mu_-$ | 10.0                                                             | 253 K | 7    | $\Phi_{DL}$  | $0.790 \pm 0.082 \text{ eV}$ | –     | 8    |
| $\mu_L$       | $1.16 \times 10^{-8} \text{ m}^2/(\text{V}\cdot\text{s})$        | 253 K | 4    | $\Phi_{D+}$  | $\sim 0 \text{ eV}$          | –     | 8    |
| $\mu_L$       | $2 \times 10^{-8} \text{ m}^2/(\text{V}\cdot\text{s})$           | 263 K | 9    | $\Phi_{D+}$  | -0.22 eV                     | –     | 10   |
| $\mu_L$       | $5 \times 10^{-8} \text{ m}^2/(\text{V}\cdot\text{s})$           | 273 K | 3    | $\Phi_{DL}$  | $0.235 \pm 0.010 \text{ eV}$ | –     | 4    |
| $\mu_L$       | $2 \times 10^{-8} \text{ m}^2/(\text{V}\cdot\text{s})$           | 253 K | 2    | $\Phi_{DL}$  | $0.190 \pm 0.017 \text{ eV}$ | –     | 8    |
| $\mu_D$       | $\leq \mu_L$                                                     | 253 K | 4    | $\Phi_{DL}$  | 0.292 eV                     | –     | 3    |
| $\mu_D$       | $\leq \mu_L$                                                     | 263 K | 9    | $\Phi_{DL}$  | 0.235 eV                     | –     | 6    |

## References

- (1) Eigen, M.; de Maeyer, L.; Spatz, H. Physics of ice crystals. *Coll. London* **1962**,
- (2) Petrenko, V. F.; Whitworth, R. W. *Physics of ice*; OUP Oxford, 1999.
- (3) Camplin, G.; Glen, J.; Paren, J. Theoretical models for interpreting the dielectric behaviour of HF-doped ice. *Journal of Glaciology* **1978**, *21*, 123–141.
- (4) Jaccard, C. Étude théorique et expérimentale des propriétés électriques de la glace. Ph.D. thesis, ETH Zurich, 1959.
- (5) Petrenko, V.; Maeno, N. Ice field transistor. *Le Journal de Physique Colloques* **1987**, *48*, C1–115.
- (6) Bilgram, J.; Gränicher, H. Defect equilibria and conduction mechanisms in ice. *Physics of condensed matter* **1974**, *18*, 275–291.
- (7) Latham, J.; Mason, B. J. Electric charge transfer associated with temperature gradients in ice. *Proceedings of the Royal Society of London. Series A. Mathematical and Physical Sciences* **1961**, *260*, 523–536.
- (8) Takei, I.; Maeno, N. Electric characteristics of point defects in HCl-doped ice. *Le Journal de Physique Colloques* **1987**, *48*, C1–121.

- (9) Gränicher, H. Properties and lattice imperfections of ice crystals and the behaviour of H<sub>2</sub>O-HF solid solutions. *Physik der kondensierten Materie* **1962**, *1*, 1–12.
- (10) Kunst, M.; Warman, J. M. Nanosecond time-resolved conductivity studies of pulse-ionized ice. 2. The mobility and trapping of protons. *The Journal of Physical Chemistry* **1983**, *87*, 4093–4095.
